# Supplementary material for: Effects of irrigation type and fertilizer application rate on growth, yield, and water and fertilizer use efficiency of silage corn in the North China Plain
Source: PeerJ. 2024 Nov 27;12:e18315. doi: 10.7717/peerj.18315 (PMC11608015; doi:10.7717/peerj.18315)
Supplement: Supplemental Information 1 [file peerj-12-18315-s001.xls]

## Sheet: Table1
Soil Depth	Bulk density	Soil particle grading (USA)			Texture	Saturated water content	Field capacity
(cm)	(g﹒cm-3)					(cm3﹒cm-3)	(cm3﹒cm-3)
		Sand (%)	Silt (%)	Clay (%)
0–20	1.25	47.42	50.38	2.2	Loam	0.302	0.232
20–40	1.33	38.47	58.98	2.55	Silty loam	0.39	0.255
40–60	1.33	43.09	56.33	2.98	Clay loam	0.365	0.258
60–80	1.29	40.69	54.23	2.68	Silty clay loam	0.418	0.276
80–100	1.43	40.6	56.6	2.8	Clay loam	0.432	0.318

## Sheet: Table2
Year	Organic matter	Alkaline hydrolysis nitrogen/mg/kg	Nitrate nitrogen	Readily phosphorus	Readily available potassium/mg/kg
			/mg/kg	/mg/kg
2017	0.03	126	26.8	13.21	131
2018	0.02	137	39.2	11.89	158

## Sheet: Table3
Year	Sample Number	Plant Height	Stem Diameter	LAI	SPAD Value
2017	16	0.125	0.373	0.048	0.14
2018	32	0.516**	0.23	0.480**	0.464**

## Sheet: Table4
Year	Variable	Coefficient	Standard Error	T	Sig.	Regression coefficient	R	DW
2017	x1	4.353	0.055	78.464	0	0.997	0.997	1.232
2018	x1	3.092	0.553	5.594	0	0.709	0.998	1.232
	x4	7.234	3.157	2.291	0.029	0.029

## Sheet: Table5
Year	Terms	df	Sum of Squares	Mean Square	F	Sig.
2017	Regression	4	78097.5	19524.4	2.467	0.106
	Residual	11	87066.7	7915.15
	Total	15	165164
2018	Regression	4	86000.8	21500.2	5.184**	0.003**
	Residual	27	111973	4147.13
	Total	31	197973

## Sheet: Table6
Year	Item	Crop development	Mid-season	Late-season	Whole growth period
2017	Days after sowing	0–30	31–60	61–91	0–91
	ET0 (mm)	135.65	120.55	97.62	353.82
	ETa (mm)	88.25	122.77	68.92	279.94
	Kc	0.65	1.02	0.71	0.79
2018	Days after sowing	0–34	35–65	66–95	0–95
	ET0 (mm)	147.36	117.2	91.28	355.84
	ETa (mm)	69.32	125.16	48.24	242.72
	Kc	0.47	1.07	0.53	0.68

## Sheet: Table7
Irrigation	Fertilizer	Development		Mid-season		Late-season		Whole period
type	rate	(0–34 days)		(35–65 days)		(66–95 days)		(0–95 days)
	(kg/ha)
		ETa (mm)	Kc	ETa (mm)	Kc	ETa (mm)	Kc	ETa (mm)	Kc
Border	750	69.01	0.47	136.6	1.17	49.78	0.55	255.39	0.72
Irrigation
	600	69.32	0.47	125.16	1.07	48.24	0.53	242.72	0.68
	450	79.52	0.54	122.68	1.05	53.8	0.59	256	0.72
	300	68.39	0.46	127.94	1.09	45.46	0.5	241.79	0.68
Furrow	750	71.17	0.48	127.01	1.08	51.95	0.57	250.13	0.7
irrigation
	600	79.52	0.54	131.03	1.12	51.33	0.56	261.88	0.74
	450	69.01	0.47	129.79	1.11	50.71	0.56	249.51	0.7
	300	70.24	0.48	118.97	1.02	55.45	0.61	244.66	0.69
ANOVA p-value	Irrigation type	0.843NS		0.780 NS		0.340 NS		0.693 NS
	Fertilizer rate	0.765 NS		0.662 NS		0.923 NS		0.642 NS

## Sheet: Table 8
Treatment		WUE	PFPN	PFPP	PFPK
Irrigation type	Fertilizer application rate	t/(ha·mm)	t/kg N	t/kg P	t/kg K
Border irrigation	750 kg/ha	0.288	0.351	3.75	1.973
	600 kg/ha	0.328	0.474	5.07	2.668
	450 kg/ha	0.291	0.592	6.327	3.329
	300 kg/ha	0.286	0.823	8.791	4.626
Furrow Irrigation	750 kg/ha	0.314	0.374	4	2.104
	600 kg/ha	0.311	0.485	5.179	2.725
	450 kg/ha	0.298	0.591	6.315	3.323
	300 kg/ha	0.299	0.872	9.317	4.902
Analysis of variance	Irrigation type	0.487 NS	0.156 NS	0.156 NS	0.156 NS
P-value
	Fertilizer application rate	0.317 NS	0.000**	0.000**	0.000**
